# Supplementary material for: Highly effective nanosegregation of dual dopants in a micron-sized nanocluster-based semiconductor molecular single crystal for targeting white-light emission
Source: Royal Society of Chemistry journal article supplement (doi:10.1039/c5tc04191k), 2016-01-01
Supplement: c5tc04191k1.pdf [file c5tc04191k1.pdf]

*Supporting Information for*

# **Highly Effective Nanosegregation of Dual Dopants in a Micron-Sized Nanocluster-Based Semiconductor Molecular Single Crystal for Targeting White-Light Emission**

Jian Lin,<sup>a</sup> Le Wang,<sup>a</sup> Qian Zhang,<sup>a</sup> Fei Bu,<sup>c</sup> Tao Wu\*,<sup>a</sup> Xianhui Bu,<sup>b</sup> and Pingyun Feng<sup>c</sup>

<sup>a</sup> *College of Chemistry, Chemical Engineering and Materials Science, Soochow University, Jiangsu 215123, China*

<sup>b</sup> *Department of Chemistry and Biochemistry, California State University, Long Beach, California 90840, United States*

<sup>c</sup> *Department of Chemistry, University of California, Riverside, California 92521, United States*

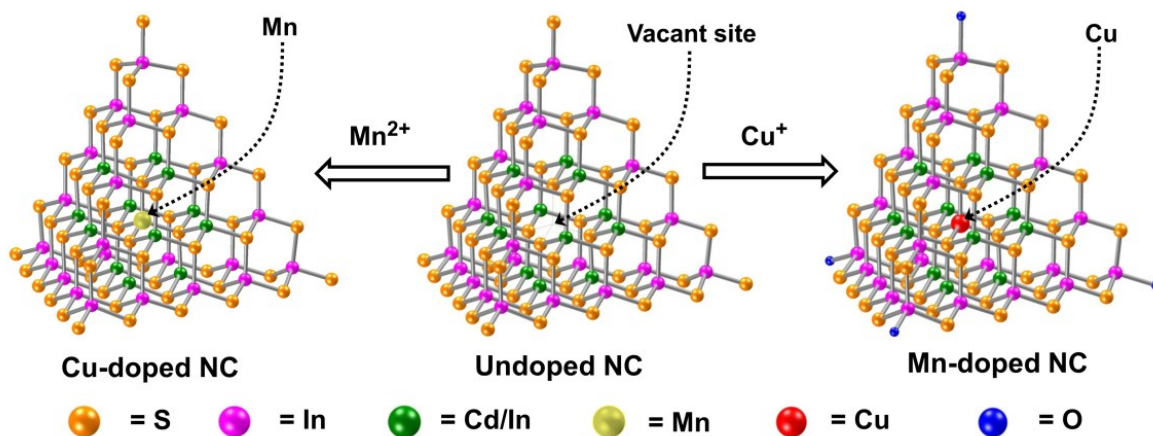

**Figure S1.** The doping process of transition metal ion ( $\text{Cu}^+$  and  $\text{Mn}^{2+}$ ) into the coreless supertetrahedral nanocluster.

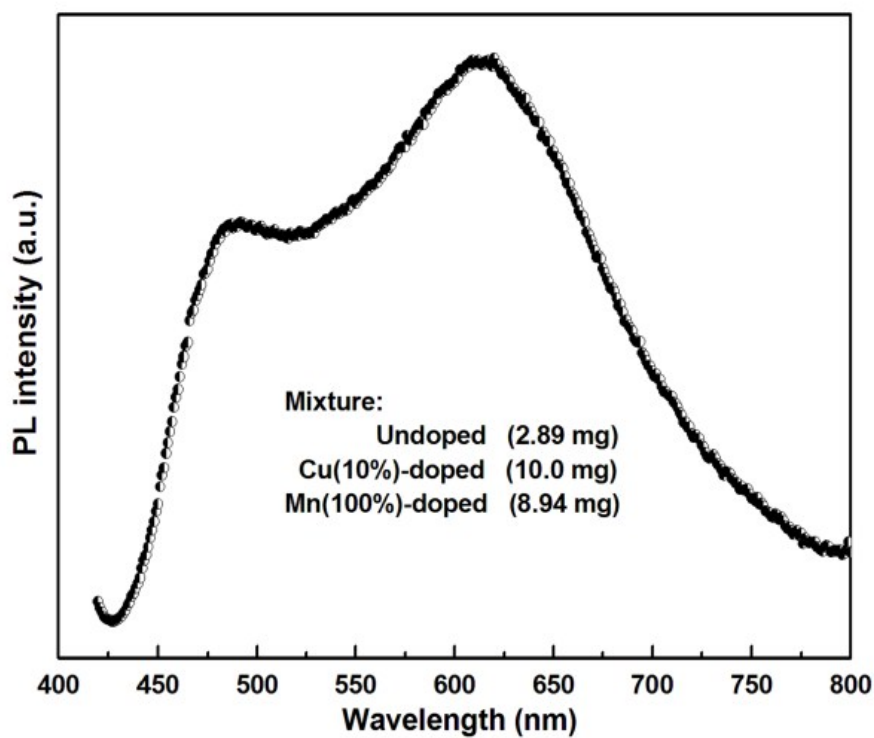

**Figure S2.** PL emission spectrum of mixture obtained by directly mixing separately synthesized singly Mn-doped, singly Cu-doped and undoped samples.

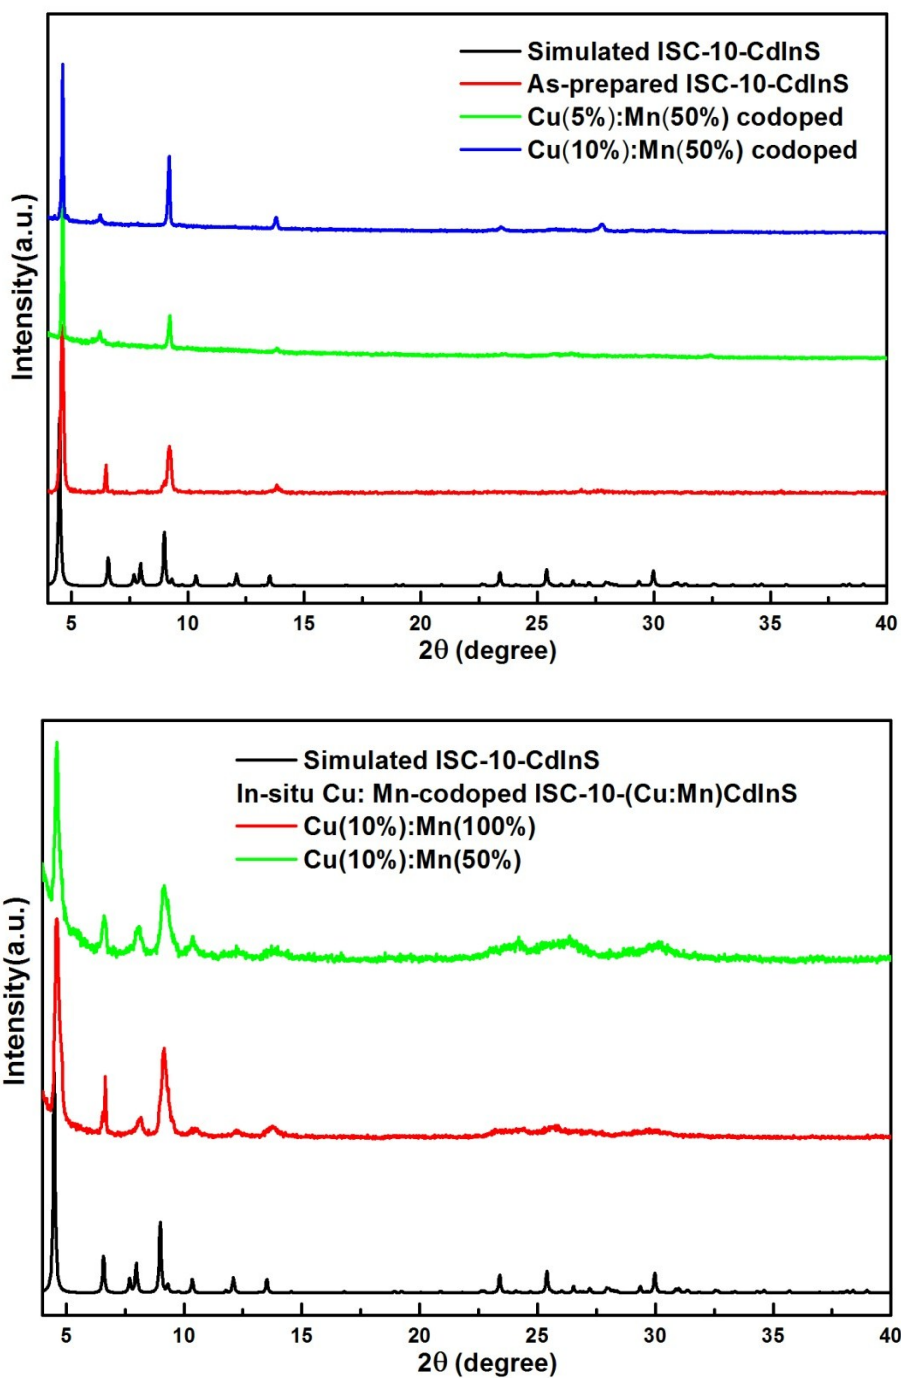

**Figure S3.** Top: powder X-ray diffraction patterns of as-synthesized and codoped sample; bottom: powder X-ray diffraction patterns of in-situ synthesized Cu:Mn-codoped samples.

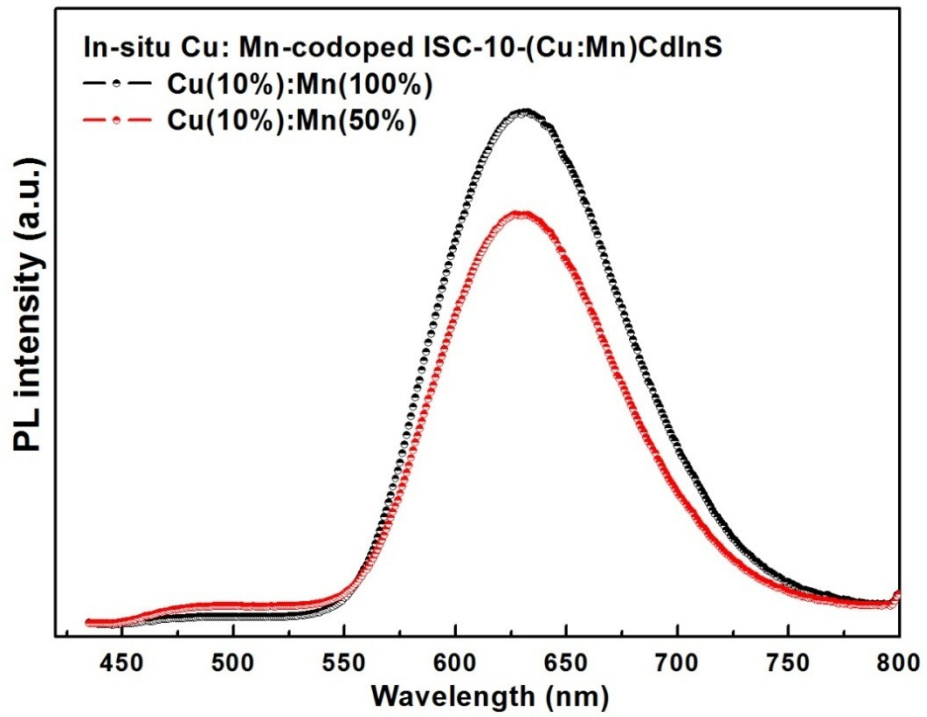

*Figure S4.* PL emission spectra of in-situ synthesized Cu:Mn-codoped samples (excited at 420 nm).

**Table S1.** Measured molar ratios of Cd:In:Mn:Cu in doped samples determined by EDS. The doping level of Cu<sup>+</sup> or Mn<sup>2+</sup> ions for doped sample is given as N%, with N being the moles of Cu<sup>+</sup> or Mn<sup>2+</sup> ions per 100 moles of T5 nanocluster. The value of N for the nominal doping level and actual doping level represents the added number of moles of Cu<sup>+</sup> or Mn<sup>2+</sup> per 100 moles of T5 nanocluster and measured one, respectively.

| Crystal Surface        | The molar ratio of<br>Cd : In : Mn : Cu by EDS |             |              |             | Nominal Doping<br>Level (N%) |     | Actual Doping<br>Level (N%) |              |
|------------------------|------------------------------------------------|-------------|--------------|-------------|------------------------------|-----|-----------------------------|--------------|
|                        | Cd                                             | In          | Mn           | Cu          | Mn                           | Cu  | Mn                          | Cu           |
| Crystal 1              | 8.8                                            | 35.2        | 0.2          | -           | 100%                         | -   | 15.8%                       | -            |
| Crystal 2              | 8.4                                            | 34.4        | 0.1          | -           | 100%                         | -   | 8.2%                        | -            |
| Crystal 3              | 7.9                                            | 31.7        | 0.1          | -           | 100%                         | -   | 8.8%                        | -            |
| Crystal 4              | 8.1                                            | 32.6        | 0.1          | -           | 100%                         | -   | 8.6%                        | -            |
| <b>Average</b>         | <b>8.3</b>                                     | <b>33.5</b> | <b>0.125</b> | -           | 100%                         | -   | <b>10.4%</b>                | -            |
| <b>Inner Surface</b>   |                                                |             |              |             |                              |     |                             |              |
| Crystal 1              | 8.7                                            | 34.5        | 0.1          | -           | 100%                         | -   | 8.1%                        | -            |
| Crystal 2              | 8.4                                            | 33.0        | 0.1          | -           | 100%                         | -   | 8.4%                        | -            |
| Crystal 3              | 8.9                                            | 33.0        | 0.2          | -           | 100%                         | -   | 16.6%                       | -            |
| <b>Average</b>         | <b>8.7</b>                                     | <b>33.5</b> | <b>0.13</b>  | -           | 100%                         | -   | <b>11.0%</b>                | -            |
| <b>Crystal Surface</b> |                                                |             |              |             |                              |     |                             |              |
| Crystal 1              | 7.9                                            | 31.8        | -            | 0.8         | -                            | 10% | -                           | 69.1%        |
| Crystal 2              | 7.9                                            | 32.4        | -            | 0.3         | -                            | 10% | -                           | 25.9%        |
| Crystal 3              | 7.8                                            | 33.5        | -            | 0.8         | -                            | 10% | -                           | 66.5%        |
| <b>Average</b>         | <b>7.9</b>                                     | <b>32.6</b> | -            | <b>0.63</b> | -                            | 10% | -                           | <b>54.0%</b> |
| <b>Inner Surface</b>   |                                                |             |              |             |                              |     |                             |              |
| Crystal 1              | 8.7                                            | 32.1        | -            | 0.1         | -                            | 10% | -                           | 8.6%         |
| Crystal 2              | 8.9                                            | 31.8        | -            | 0.0         | -                            | 10% | -                           | 0.0%         |
| Crystal 3              | 8.7                                            | 31.4        | -            | 0.4         | -                            | 10% | -                           | 34.6%        |
| <b>Average</b>         | <b>8.8</b>                                     | <b>31.8</b> | -            | <b>0.17</b> | -                            | 10% | -                           | <b>14.3%</b> |
| <b>Crystal Surface</b> |                                                |             |              |             |                              |     |                             |              |

|                        |            |             |            |             |      |     |              |              |
|------------------------|------------|-------------|------------|-------------|------|-----|--------------|--------------|
| Crystal 1              | 7.9        | 35.1        | 0.1        | 0.9         | 50%  | 10% | 8.0%         | 71.6%        |
| Crystal 2              | 7.4        | 31.0        | 0.1        | 0.3         | 50%  | 10% | 9.0%         | 27.1%        |
| <b>Average</b>         | <b>7.7</b> | <b>33.1</b> | <b>0.1</b> | <b>0.6</b>  | 50%  | 10% | <b>8.5%</b>  | <b>50.7%</b> |
| <b>Inner Surface</b>   |            |             |            |             |      |     |              |              |
| Crystal 1              | 9.0        | 31.3        | 0.3        | 0.1         | 50%  | 10% | 25.8%        | 8.6%         |
| Crystal 2              | 9.0        | 29.4        | 0.1        | 0.2         | 50%  | 10% | 9.0%         | 18.1%        |
| Crystal 3              | 8.5        | 30.9        | 0.2        | 0.8         | 50%  | 10% | 17.3%        | 69.3%        |
| <b>Average</b>         | <b>8.8</b> | <b>30.5</b> | <b>0.2</b> | <b>0.37</b> | 50%  | 10% | <b>17.5%</b> | <b>32.1%</b> |
|                        |            |             |            |             |      |     |              |              |
| <b>Crystal Surface</b> |            |             |            |             |      |     |              |              |
| Crystal 1              | 8.1        | 31.6        | 0.0        | 0.5         | 100% | 10% | 0.0%         | 43.5%        |
| Crystal 2              | 8.3        | 36.0        | 0.2        | 0.7         | 100% | 10% | 15.5%        | 54.2%        |
| <b>Average</b>         | <b>8.2</b> | <b>33.8</b> | <b>0.1</b> | <b>0.6</b>  | 100% | 10% | <b>8.2%</b>  | <b>49.2%</b> |
| <b>Inner Surface</b>   |            |             |            |             |      |     |              |              |
| Crystal 1              | 8.6        | 32.3        | 0.3        | 0.2         | 100% | 10% | 25.4%        | 16.9%        |
| Crystal 2              | 8.7        | 32.1        | 0.3        | 0.3         | 100% | 10% | 25.4%        | 25.4%        |
| Crystal 3              | 9.2        | 33.5        | 0.3        | 0.2         | 100% | 10% | 24.3%        | 16.2%        |
| <b>Average</b>         | <b>8.8</b> | <b>32.6</b> | <b>0.3</b> | <b>0.23</b> | 100% | 10% | <b>25.0%</b> | <b>19.4%</b> |

**Table S2.** Time constants  $\tau_1$ ,  $\tau_2$ , and  $\tau_3$ , the corresponding amplitudes of the components A1, A2 and A3 at different emission sites of Mn<sup>2+</sup>(100%)-doped ISC-10-CdInS under interband excitation at 400nm. Fit parameter deriving from  $I(t) = A \sum I_i \exp(-t/\tau_i)$ , and weighted average lifetime  $\tau_{ave} = \sum A_i \tau_i^2 / \sum A_i \tau_i$ .

| 100% Mn Doped | $\tau_1$ (ms) | A <sub>1</sub> (%) | $\tau_2$ (ms) | A <sub>2</sub> (%) | $\tau_3$ (ms) | A <sub>3</sub> (%) | $\tau_{ave}$ (ms) |
|---------------|---------------|--------------------|---------------|--------------------|---------------|--------------------|-------------------|
| 550           | 0.27          | 23%                | 1.33          | 77%                |               |                    | 1.267             |
| 580           | 0.29          | 15%                | 1.36          | 85%                |               |                    | 1.324             |
| 600           | 0.21          | 11%                | 1.17          | 89%                |               |                    | 1.147             |
| 630           | 0.15          | 3%                 | 0.51          | 21%                | 1.46          | 76%                | 1.377             |
| 650           | 0.07          | 1%                 | 0.37          | 16%                | 1.34          | 83%                | 1.288             |
| 700           | 0.11          | 1%                 | 0.38          | 17%                | 1.31          | 82%                | 1.260             |

**Table S3.** Time constants  $\tau_1$ ,  $\tau_2$ , and  $\tau_3$ , the corresponding amplitudes of the components A1, A2 and A3 at different emission sites of Cu<sup>+</sup>,Mn<sup>2+</sup>(10%,50%)-codoped ISC-10-CdInS under interband excitation at 400nm. Fit parameter deriving from  $I(t) = A \sum I_i \exp(-t/\tau_i)$ , and weighted average lifetime  $\tau_{ave} = \sum A_i \tau_i^2 / \sum A_i \tau_i$ .

| Codoped 10-50% | $\tau_1$ (ms) | A <sub>1</sub> (%) | $\tau_2$ (ms) | A <sub>2</sub> (%) | $\tau_3$ (ms) | A <sub>3</sub> (%) | $\tau_{ave}$ (ms) |
|----------------|---------------|--------------------|---------------|--------------------|---------------|--------------------|-------------------|
| 550            | 0.06          | 2%                 | 0.28          | 30%                | 0.96          | 68%                | 0.885             |
| 580            | 0.24          | 26%                | 1.00          | 74%                |               |                    | 0.937             |
| 600            | 0.04          | 1%                 | 0.30          | 28%                | 1.05          | 71%                | 0.971             |
| 630            | 0.07          | 2%                 | 0.35          | 30%                | 1.11          | 68%                | 1.011             |
| 650            | 0.04          | 2%                 | 0.32          | 28%                | 1.07          | 70%                | 0.987             |
| 700            | 0.23          | 20%                | 0.96          | 80%                |               |                    | 0.916             |

**Table S4.** Time constants  $\tau_1$ ,  $\tau_2$ , and  $\tau_3$ , the corresponding amplitudes of the components A1, A2 and A3 at different emission sites of Cu<sup>+</sup>,Mn<sup>2+</sup>(10%, 100%)-codoped ISC-10-CdInS under interband excitation at 400nm. Fit parameter deriving from  $I(t) = A \sum I_i \exp(-t/\tau_i)$ , and weighted average lifetime  $\tau_{ave} = \sum A_i \tau_i^2 / \sum A_i \tau_i$ .

| Codoped 10-100% | $\tau_1$ (ms) | A <sub>1</sub> (%) | $\tau_2$ (ms) | A <sub>2</sub> (%) | $\tau_3$ (ms) | A <sub>3</sub> (%) | $\tau_{ave}$ (ms) |
|-----------------|---------------|--------------------|---------------|--------------------|---------------|--------------------|-------------------|
| 550             | 0.11          | 6%                 | 0.38          | 39%                | 1.37          | 55%                | 1.196             |
| 600             | 0.19          | 21%                | 0.77          | 79%                |               |                    | 0.734             |
| 630             | 0.03          | 2%                 | 0.29          | 31%                | 1.10          | 67%                | 1.006             |
| 650             | 0.02          | 2%                 | 0.28          | 29%                | 1.08          | 69%                | 0.999             |
| 700             | 0.14          | 7%                 | 0.51          | 39%                | 1.52          | 54%                | 1.312             |
